# Supplementary material for: Genome-Wide Association Study Revealed SNP Alleles Associated with Seed Size Traits in African Yam Bean (Sphenostylis stenocarpa (Hochst ex. A. Rich.) Harms)
Source: Genes (Basel). 2022 Dec 13;13(12):2350. doi: 10.3390/genes13122350 (PMC9777823; doi:10.3390/genes13122350)
Supplement: Supplementary file 1 [file genes-13-02350-s001.zip › Olomitutu et al. Supplementary Table.xlsx]

## Sheet: Supplemental Table S1
Supplemental Table S1 DArTseq SNPs markers having significant association with seed-size traits of 195 accessions of African yam bean evaluated during the 2018 and 2019 cropping seasons in Ibadan, Kano and Ubiaja.
SN	Trait	Marker	Position	GLM		MLM		Location
				P-value	MarkerR2	P-value	MarkerR2
1	HSW	29423037|F|0-63:C>T-63:C>T	1790	8.2182e-05	0.07223			Ibadan
2	HSW	29423135|F|0-15:A>T-15:A>T	1844	0.0006583	0.06858			Ibadan
3	HSW	29423506|F|0-18:A>C-18:A>C	2041	0.00080062	0.07346	0.00041756	0.08941	Ibadan
4	HSW	100025280|F|0-62:G>T-62:G>T	2155	0.00040674	0.05869	0.0008853	0.05894	Ibadan
5	HSW	29421951|F|0-37:A>C-37:A>C	2187	0.00037142	0.0719			Ibadan
6	HSW	29422234|F|0-7:G>C-7:G>C	2383	7.6924e-05	0.09371	0.00023763	0.09738	Ibadan
7	SL	100020507|F|0-8:G>C-8:G>C	146	0.00073206	0.065			Ibadan
8	SL	100033556|F|0-45:A>G-45:A>G	204	0.00035819	0.07117	0.00060617	0.07754	Ibadan
9	SL	29420902|F|0-48:C>G-48:C>G	855	9.1997e-05	0.08498	0.00023745	0.08897	Ibadan
10	SL	29420980|F|0-33:A>G-33:A>G	902	0.0007734	0.06453			Ibadan
11	SL	29421419|F|0-14:G>T-14:G>T	1086	0.00019604	0.07634			Ibadan
12	SL	29421990|F|0-29:G>A-29:G>A	1241	0.00062181	0.06911			Ibadan
13	ST	100006540|F|0-20:T>G-20:T>G	70	7.9394e-05	0.08612	0.00025158	0.08886	Ibadan
14	ST	100009381|F|0-9:C>T-9:C>T	116	0.0007727	0.06731			Ibadan
15	ST	100039302|F|0-7:A>T-7:A>T	239	0.00046431	0.07067			Ibadan
16	ST	29419975|F|0-11:G>A-11:G>A	285	0.00024456	0.07631			Ibadan
17	ST	29420577|F|0-18:C>T-18:C>T	671	0.00044816	0.07098	0.00073911	0.07686	Ibadan
18	ST	29420626|F|0-52:A>T-52:A>T	695	0.00082028	0.0659			Ibadan
19	ST	29422369|F|0-43:T>G-43:T>G	1462	0.00021242	0.08723			Ibadan
20	ST	29421256|F|0-15:A>G-15:A>G	2225	3.5539e-05	0.09705	0.0003497	0.08973	Ibadan
21	ST	29420736|F|0-57:G>T-57:G>T	2364	0.00047987	0.07038	0.00067879	0.0778	Ibadan
22	ST	100025201|F|0-67:T>C-67:T>C	2464	0.00030763	0.0743			Ibadan
23	SW	100003047|F|0-64:T>A-64:T>A	5	0.00055464	0.07181	0.00075792	0.07692	Ibadan
24	SW	100006540|F|0-20:T>G-20:T>G	70	0.00025554	0.07891	0.00068442	0.07806	Ibadan
25	SW	29420035|F|0-28:C>A-28:C>A	326	0.00078639	0.06859	0.00082191	0.07602	Ibadan
26	SW	29420560|F|0-12:A>G-12:A>G	660	9.4295e-05	0.08795	0.00033629	0.086	Ibadan
27	SW	29420636|F|0-34:G>A-34:G>A	698	0.00074554	0.06959	0.00060052	0.08042	Ibadan
28	SW	29420997|F|0-39:T>G-39:T>G	913	0.0006325	0.07134	0.00083547	0.07598	Ibadan
29	SW	29422384|F|0-12:C>A-12:C>A	1475	0.00016364	0.08296	0.00027402	0.0883	Ibadan
30	SW	29423121|F|0-28:G>C-28:G>C	1837	6.3537e-05	0.09151	0.00025585	0.08907	Ibadan
31	SW	29421951|F|0-37:A>C-37:A>C	2187	1.8604e-05	0.10135	8.7658e-05	0.10614	Ibadan
32	SW	29420377|F|0-15:C>A-15:C>A	2458	0.00077537	0.06872			Ibadan
33	HSW	29420330|F|0-48:C>T-48:C>T	521	0.00043657	0.07798	0.00090404	0.07582	Kano
34	HSW	29420784|F|0-5:G>A-5:G>A	784	0.00059823	0.07493			Kano
35	HSW	29421549|F|0-25:A>C-25:A>C	1124	0.00067325	0.07491			Kano
36	HSW	29422467|F|0-10:G>C-10:G>C	1503	0.00013368	0.08935	0.00030225	0.08819	Kano
37	HSW	29422320|F|0-37:T>C-37:T>C	2257	0.00022231	0.08481	0.00041679	0.08513	Kano
38	SL	29420732|F|0-56:T>G-56:T>G	753	0.00061755	0.07423			Kano
39	SL	29421428|F|0-9:C>A-9:C>A	1088	0.00032273	0.08047	0.00062883	0.08017	Kano
40	SL	29422009|F|0-31:T>A-31:T>A	1258	0.0001412	0.08836	0.0003428	0.08705	Kano
41	SL	29422320|F|0-37:T>C-37:T>C	2257	0.00047505	0.0771	0.00082017	0.07719	Kano
42	ST	100043388|F|0-30:T>G-30:T>G	253	4.7731e-05	0.08315	0.00015377	0.0781	Kano
43	ST	100043389|F|0-33:G>C-33:G>C	254	4.1123e-05	0.08228	0.00014468	0.07746	Kano
44	ST	29420980|F|0-33:A>G-33:A>G	902	0.0004783	0.0753	0.00091514	0.07478	Kano
45	ST	29420736|F|0-57:G>T-57:G>T	2364	0.00077466	0.07073			Kano
46	SW	100008540|F|0-10:C>T-10:C>T	98	0.00038075	0.07988	0.00047591	0.08375	Kano
47	SW	100024528|F|0-45:C>T-45:C>T	152	0.00036921	0.08017	0.00046674	0.08398	Kano
48	SW	29421428|F|0-9:C>A-9:C>A	1088	0.00015986	0.08827	0.00034267	0.08751	Kano
49	SW	29420736|F|0-57:G>T-57:G>T	2364	6.9109e-05	0.09632	0.00014998	0.097	Kano
50	HSW	100026424|F|0-37:C>T-37:C>T	177	0.00070302	0.05014			Ubiaja
51	HSW	29420083|F|0-44:C>T-44:C>T	359	0.00044251	0.06692			Ubiaja
52	HSW	29421549|F|0-25:A>C-25:A>C	1124	0.00043439	0.06799			Ubiaja
53	HSW	29421697|F|0-16:C>G-16:C>G	1170	0.00039266	0.06793			Ubiaja
54	HSW	29420297|F|0-59:A>G-59:A>G	2391	0.00079261	0.06206			Ubiaja
55	SL	29420980|F|0-33:A>G-33:A>G	902	0.00099211	0.06346			Ubiaja
56	SL	29423011|F|0-50:G>A-50:G>A	1769	7.5252e-05	0.08595	0.00016546	0.08595	Ubiaja
57	SL	29423156|F|0-27:C>T-27:C>T	1855	3.7772e-05	0.09185	9.3612e-05	0.09186	Ubiaja
58	ST	100019839|F|0-33:C>G-33:C>G	142	0.00073352	0.06505	0.00093411	0.07291	Ubiaja
59	ST	100034480|F|0-31:C>A-31:C>A	216	1.3532e-05	0.09894	5.0751e-05	0.105	Ubiaja
60	SW	100008851|F|0-26:T>C-26:T>C	106	0.00013505	0.08209	0.00026707	0.08209	Ubiaja
61	SW	100008911|F|0-27:T>C-27:T>C	108	0.00032591	0.07395	0.00057013	0.07395	Ubiaja
